1 **MOG-reactive B cells exacerbate the severity of CD4<sup>+</sup> T cell-driven CNS**  
2 **autoimmunity.**

3

4 Prenitha Mercy Ignatius Arokia Doss<sup>1</sup>, Asmita Pradeep Yeola<sup>1</sup>, Benoit Mailhot<sup>1</sup>,  
5 Joanie Baillargeon<sup>1</sup>, Philippe Grenier<sup>2</sup>, Steve Lacroix<sup>1,3</sup>, Nicolas Bertrand<sup>2,4</sup>,  
6 Manu Rangachari<sup>1,3,5</sup>.

7

8 <sup>1</sup> axe Neurosciences, Centre de recherche du CHU de Québec – Université  
9 Laval, Pavillon CHUL, 2705 boul Laurier, Quebec City, QC, CANADA G1V 4G2; <sup>2</sup>  
10 axe Endocrinologie et nephrologie, Centre de recherche du CHU de Québec –  
11 Université Laval, Pavillon CHUL, 2705 boul Laurier, Quebec City, QC, CANADA  
12 G1V 4G2; <sup>3</sup> Department of Molecular Medicine, Faculty of Medicine, Laval  
13 University, 1050 ave de la Médecine, Quebec City, CANADA; <sup>4</sup> Faculty of  
14 Pharmacy, Laval University, 1050 ave de la Médecine, Quebec City, CANADA; <sup>5</sup>  
15 Corresponding author.

16

17

18 **Abstract**

19 **BACKGROUND:** Multiple sclerosis (MS) is an autoimmune disorder of the central  
20 nervous system (CNS) that has traditionally been considered T cell-mediated.  
21 However, accumulating evidence points to a crucial role for B cells in disease  
22 processes. Experimental autoimmune encephalomyelitis (EAE) is a well-  
23 established model to study the immune aspects of CNS autoimmunity.

24

25 **METHODS:** In order to examine the collaboration of B cells and T cells in EAE,  
26 we studied non-obese diabetic (NOD)-background IgH[MOG] mice, whose B  
27 cells express a transgenic IgH chain derived from a myelin oligodendrocyte  
28 glycoprotein (MOG)-specific antibody. We immunized these and NOD WT  
29 controls with the MHC class II-restricted peptide MOG<sub>[35-55]</sub>, which induces a  
30 CD4<sup>+</sup> T cell-driven response. CNS tissue inflammation and demyelination were  
31 assessed histopathologically, and the phenotype of CNS-infiltrating mononuclear  
32 cells was studied by flow cytometry. The capacity of IgH[MOG] B cells to present  
33 antigen to CD4<sup>+</sup> T cells was assessed using *in vitro* priming assays with MOG<sub>[35-  
34 55]</sub> as the antigen.

35

36 **RESULTS:** MOG<sub>[35-55]</sub>-immunized IgH[MOG] mice rapidly developed severe EAE  
37 characterized by leukocytic infiltration and demyelination in the brain, spinal cord  
38 and optic nerve. Notably, while the frequency of CD4<sup>+</sup> T cells was increased in  
39 the CNS of IgH[MOG] with severe disease relative to controls, no differences  
40 were observed with respect to the frequency of B cells. Further, IgH[MOG] CNS-

41 infiltrating CD4<sup>+</sup> T cells produced significantly higher levels of Th17-associated  
42 cytokines GM-CSF and IL-17 compared to those from controls. Mechanistically,  
43 IgH[MOG] B cells were better able than WT B cells to elicit inflammatory cytokine  
44 production from MOG<sub>[35-55]</sub>-specific CD4<sup>+</sup> T cells in *in vitro* priming assays.

45

46 **CONCLUSION:** These data show that MOG-specific B cells contribute to CD4<sup>+</sup> T  
47 cell-driven EAE by promoting CD4<sup>+</sup> T cell inflammation and recruitment to the  
48 CNS.

49

50 **Keywords:** experimental autoimmune encephalomyelitis, B cell, CD4<sup>+</sup> T cell,  
51 myelin oligodendrocyte glycoprotein (MOG), IgH[MOG], 1C6, non-obese diabetic  
52 (NOD)

53

## 54 **Background**

55 Multiple sclerosis (MS) is a chronic neurodegenerative disease in which the  
56 adaptive immune system launched an attack against central nervous system  
57 (CNS) proteins, such as myelin, ultimately resulting in neurological dysfunction  
58 and death. MS affects more than 2 million people worldwide [1]. Approximately  
59 80% of patients present an initially relapsing-remitting (RR) disease course for  
60 which there are now more than 10 disease-modifying therapies available.  
61 However, 30-60% of these (RR) patients will eventually transition to a chronically  
62 worsening secondary progressive (SP) phase, for which treatment options are  
63 limited [2]. Pathophysiological mechanisms in progressive MS are thus of intense  
64 current interest [3].

65

66 T cells, and CD4<sup>+</sup> T cells in particular, have been the most intensively studied  
67 players in the immune pathogenesis of MS. However, it has become increasingly  
68 clear that B cells additionally play important roles in MS pathogenesis. Clonally  
69 expanded B cells are present in the cerebrospinal fluid (CSF) and MS plaques [4-  
70 6], and the presence of meningeal follicles adjacent to cortical lesions is  
71 associated with disease progression [7,8]. Further, antibodies against myelin  
72 oligodendrocyte glycoprotein (MOG), a key component of myelin, were found in  
73 active MS lesions [9]. Crucially, the B cell targeting reagent ocrelizumab (anti-  
74 CD20) results in striking improvements in RR-MS, and is the only FDA approved  
75 drug for primary progressive MS [10,11]. Intriguingly, antibody-secreting B cells  
76 do not express CD20 [12]. This suggests that the principal pathogenic role of B

77 cells in MS might be unrelated to the generation of autoantibodies, and rather to  
78 their capacity to interact with other immune cell types, such as T cells.

79 Experimental autoimmune encephalomyelitis (EAE) is an animal disease  
80 that models many of the immune aspects of MS pathogenesis. Use of this model  
81 has helped us to understand the role of T cells, and CD4<sup>+</sup> T cells in particular, in  
82 the initiation and maintenance of autoreactive inflammation in the CNS [13].  
83 However, studies using the transgenic IgH[MOG] mouse strain have indicated  
84 that B cells may also play a crucial role in EAE pathology. These mice express a  
85 knock-in transgenic IgH chain derived from a MOG-specific antibody; thus,  
86 around 30% of their B cells are therefore specific for MOG protein [14]. IgH[MOG]  
87 animals develop severe EAE when immunized with either whole MOG protein  
88 [14] or with its extracellular domain (MOG<sub>[1-125]</sub>)[15], indicating an important role  
89 for MOG-reactive B cells in neuroimmune processes. However the potential  
90 mechanisms by which MOG-reactive B cells facilitate T cell-driven pathogenicity,  
91 such as in class II-restricted peptide immunization models of EAE, remain  
92 incompletely understood.

93 Here, we studied the co-operative role of B cells and T cells in CNS  
94 autoimmunity using IgH[MOG] mice on the non-obese diabetic (NOD) genetic  
95 background. We immunized these, and wildtype (WT) NOD mice, with MOG<sub>[35-55]</sub>,  
96 a MHC class II-restricted peptide that obligatorily drives a CD4<sup>+</sup> T cell response.  
97 While WT NOD mice gradually develop a relapsing chronic form of EAE over the  
98 course of 80-100 days when immunized with MOG<sub>[35-55]</sub> [16], we observed that  
99 IgH[MOG] mice developed a severe form of EAE within 14 days that was

100 characterized by demyelination and inflammation of the CNS. Disease in these  
101 animals was accompanied by an increase in CNS-infiltrating T cells that  
102 expressed higher levels of the inflammatory cytokines IL-17 and GM-CSF as  
103 compared to wildtype controls. Importantly, IgH[MOG] B cells could prime  
104 MOG<sub>[35-55]</sub>-reactive T cells to produce increased inflammatory cytokines *in vitro*.  
105 Hence, we demonstrate that the collaborative role of B cells and T cells are  
106 important for severe CNS autoimmunity.

107

## 108 **Methods**

109

### 110 *Animals*

111 IgH[MOG] mice on the NOD background were a gift from Dr. Hartmurt Wekerle  
112 and 1C6 mice were a gift from Dr. Vijay Kuchroo. NOD/ShiLtJ mice were  
113 purchased from Jackson Laboratories. The sex of the mice used is indicated in  
114 each figure legend.

115

### 116 *EAE induction and scoring*

117 NOD and IgH[MOG] mice were immunized subcutaneously with 200µg MOG<sub>[35-55]</sub>  
118 (Feldan), emulsified in incomplete Freund's adjuvant (BD Difco) that was  
119 supplemented with 500 µg *M. tuberculosis* extract (BD Difco). On day 0 and day  
120 2 post-immunization, mice received 200 ng pertussis toxin (List Biological  
121 Laboratories) intraperitoneally. Mice were monitored daily for signs of EAE, which  
122 were assessed using a semi-quantitative 0-5 scale: 0; no disease, 0.5; ruffled fur,

123 1; limp tail, 1.5; mild impairment in gait, 2; severe impairment in gait, 2.5; partial  
124 hind limb paralysis, 3; hind limb paralysis, 4; forelimb paralysis, 5; moribund [17].  
125 Pre-onset analyses were conducted a minimum of 5 days post-immunization but  
126 before the onset of symptoms. Endpoint analyses were conducted at d14.

127

### 128 *Histopathology*

129 EAE mice were euthanized, and CNS tissue and optic nerves were immediately  
130 fixed in 4% paraformaldehyde solution. After 24 hours, the tissues were  
131 transferred into PBS for paraffin embedding. Paraffin embedded sections were  
132 made at 4 µm thickness and stained with Hematoxylin & Eosin (H&E) to detect  
133 the infiltration of immune cells, or Luxol fast blue (LFB) to detect demyelination.  
134 The images were taken at 10X and 20X magnifications with Nikon Eclipse 80i  
135 microscope and were analysed using ImageJ software (NIH).

136

### 137 *Measurement of serum immunoglobulin*

138 Blood samples were collected from NOD and IgH[MOG] unimmunized mice, as  
139 well as from immunized mice at pre-onset and experimental endpoint, in an  
140 EDTA-coated Microvette (Sarstedt). They were centrifuged at 2000g for 20  
141 minutes at 4°C to obtain plasma. The concentration of plasma IgM was analysed  
142 using the HRP C57BL/6J Mouse Clonotyping System (Southern Biotech)  
143 according to the manufacturer's instructions.

144

145

146 *Isolation of CNS-infiltrating mononuclear cells*

147 Mice were euthanized and perfused intracardially with PBS. Brain and spinal cord  
148 were dissected from the skull and vertebral column respectively and were  
149 prepared as previously described [17]. Briefly, CNS tissues were digested with  
150 liberase (Roche) and DNase I (Sigma) and cells were enriched using a 35%  
151 Percoll (GE Healthcare) gradient.

152

153 *Flow cytometry*

154 Single cell suspensions were obtained from spleens, lymph nodes and CNS of  
155 EAE mice. For detection of surface antigens, cells were stained with Fixable  
156 Viability Dye (eBioscience) and incubated with Fc Block (Biolegend) prior to  
157 staining with antibodies against surface antigens (CD45, CD4, CD8, CD19,  
158 CD11b, CD11c, Ly6G; details in following section). For detection of intracellular  
159 cytokines, cells were first stimulated with 50ng ml<sup>-1</sup> PMA (Sigma), 1μM ionomycin  
160 (Sigma) and 1μL mL<sup>-1</sup> GolgiStop (BD) for 4 hours at 37°C, prior to being labeled  
161 with viability indicator, Fc Block and relevant surface antigens as above. They  
162 were then fixed and permeabilized (Fixation Buffer and Intracellular Staining  
163 Perm Wash Buffer, both Biolegend) and stained for intracellular cytokines (IFN-γ,  
164 TNF-α, IL-17A, GM-CSF; details in following section). Samples were analyzed on  
165 a FACS Aria (BD) and data were analyzed using FlowJo software (Treestar).

166

167

168



169 *Flow cytometry antibodies*

170 The following monoclonal antibodies against mouse antigens were used: CD45,  
171 clone A20 (Biolegend); CD11b, clone M1/70 (eBioscience); CD11c, clone N418  
172 (Biolegend); Ly6G, clone 1A8 (BD Biosciences); CD4, clone RM4-5  
173 (eBioscience); CD8, clone 53-6.7 (Biolegend); CD19, clone 1D3 (eBioscience);  
174 IFN- $\gamma$ , clone XMG1.2 (eBioscience); TNF- $\alpha$ , clone MP6-XT22 (eBioscience); IL-  
175 17a, clone TC11-18H10.1 (Biolegend); GM-CSF, clone MP1-22E9 (eBioscience);  
176 CD40, clone 3/23 (Biolegend); CD80, clone 1610A1 (Biolegend).

177

178 *Antigen presentation assay*

179 Single cell suspensions were obtained from the spleens of unimmunized NOD  
180 and IgH[MOG] mice. Cells were labeled with CD43 (Ly-48) Microbeads (Miltenyi),  
181 and CD43<sup>+</sup> leukocytes (all leukocytes except resting B cells) were depleted on a  
182 magnetic MACS column (Miltenyi). Unlabelled CD43<sup>-</sup> cells were collected and  
183 were subsequently stained with anti-mouse CD19. CD19<sup>+</sup> B cells were purified  
184 using high-speed cell sorting. In parallel, CD4<sup>+</sup> T cells were purified from the  
185 spleens of 1C6 mice using mouse CD4 MicroBeads (Miltenyi) and labeled with  
186 CellTrace Violet (CTV; Thermo Fisher Scientific). CTV-labeled 1C6 CD4<sup>+</sup> T cells  
187 were cultured with B cells at a ratio of 1 CD4: 1 B, with 0, 1 or 10 $\mu$ g ml<sup>-1</sup> MOG<sub>[35-</sub>  
188 <sub>55]</sub> for 72 hours. CTV dilution and intracellular cytokine production were assessed  
189 by flow cytometry.

190

191

192 *Statistical analysis*

193 For comparison of EAE scores on individual days, Mann-Whitney *U* test was  
194 used. Fisher's exact test was used to measure the frequency of mice attaining  
195 ethical endpoints. For immunoglobulin analyses and *ex vivo* cytokine profiling,  
196 unpaired Student *t*-tests were used. For cytokine production in the *in vitro* priming  
197 experiment, two way ANOVA was used. Two-tailed analyses were used in all  
198 instances. All statistical analyses were conducted using Prism software  
199 (GraphPad).

200

201 **Results**

202

203 *IgH[MOG] mice develop severe EAE upon active immunization with MOG<sub>[35-55]</sub>*

204 When immunized with MOG<sub>[35-55]</sub>, wildtype (WT) NOD strain gradually  
205 develop an initial relapse remitting pattern that ultimately transitions to a  
206 chronically worsening phase over the course of 60-100 days [16]. NOD-EAE has  
207 thus been considered a possible model of SPMS [18,19]. To assess whether the  
208 presence of substantial numbers of MOG-reactive B cells could alter this disease  
209 pattern, we immunized IgH[MOG] and NOD controls with MOG<sub>[35-55]</sub>. Strikingly,  
210 immunized IgH[MOG] mice rapidly developed severe EAE within 14 days (Figure  
211 1), while WT NOD mice either were disease-free or had only mild symptoms at  
212 this timepoint (mean maximal severity,  $3.1 \pm 0.2$  for IgH[MOG],  $n=27$ ;  $0.07 \pm 0.07$   
213 for WT NOD,  $n=19$ ;  $p < 0.0001$ ). Strikingly, 55% of immunized IgH[MOG] mice  
214 (15/27) attained ethical endpoints and had to be euthanized by d14; no WT NOD

215 attained disease of this severity (0/19;  $p < 0.0001$ ). For the remainder of the study,  
216 d14 was therefore treated as the endpoint of immunization protocols.

217 We next examined CNS tissue damage in actively immunized mice.  
218 Immunized IgH[MOG] mice displayed immune infiltration the cerebellum (Figure  
219 2A) and pons (Figure 2B), as well as the spinal cord (Figure 2C) and optic nerve  
220 (Figure 2D). Demyelination was also observed in these tissues (Figures 2E-H).  
221 By contrast, there was little to no infiltration or demyelination of CNS tissue  
222 observed in immunized WT NOD mice sacrificed in parallel. Our data thus show  
223 that the presence of myelin-reactive B cells can exacerbate CNS autoimmunity  
224 and tissue damage when EAE is induced in a  $CD4^+$  T cell dependent manner.

225

#### 226 *Decrease in plasma IgM in immunized IgH[MOG] mice*

227 Antigen-specific antibody (Ab) secretion is the primary function of B cells.  
228 Further, oligoclonal immunoglobulin (Ig) banding in cerebrospinal fluid (CSF) is  
229 an important diagnostic marker for MS [20]. Upon initial activation, B cells first  
230 secrete antigen-specific Abs of the IgM isotype [21]. The Ab secreted by a given  
231 B cell clone can later “switch” to a different isotype based on the presence of  
232 differentiation cues in the local milieu, such as cytokines secreted by T cells [22].  
233 We therefore wanted to examine whether changes in total serum IgM might  
234 reflect the rapid nature of the disease observed in IgH[MOG] mice. We collected  
235 sera from immunized NOD versus IgH[MOG] at pre-onset (PO) and at disease  
236 endpoint (EP), and additionally from unimmunized (UI) mice of both strains. We  
237 then analyzed these sera for the presence of IgM. We found that the

238 concentration of plasma IgM levels was significantly reduced in IgH[MOG] mice  
239 at endpoint relative to NOD controls, indicative of increased switching to  
240 secondary isotype subclasses in the context of severe disease (Figure 3). These  
241 data indicated that exacerbated disease in IgH[MOG] mice is accompanied by  
242 isotype class switching and therefore pointed towards the potential collaboration  
243 of MOG-reactive B cells with other immune cell types.

244

245 *Increased presence of immune cells in the CNS of immunized IgH[MOG] mice.*

246 We next wanted to examine whether there were differences between NOD  
247 and IgH[MOG] mice in the composition of the immune cells infiltrating the CNS.  
248 We first sacrificed mice at the pre-onset stage (d5-post immunization) and  
249 analyzed the percentage of immune cells (CD19<sup>+</sup> B cells, CD4<sup>+</sup> T cells, CD8<sup>+</sup> T  
250 cells, CD11b<sup>+</sup>CD11c<sup>+</sup> dendritic cells, CD11b<sup>+</sup>CD11c<sup>-</sup>Ly6G<sup>-</sup> macrophages and  
251 CD11b<sup>+</sup>Ly6G<sup>+</sup> neutrophils) in both CNS and spleen. At this early timepoint,  
252 differences in the frequency of such cells were modest in both CNS (Figure 4A)  
253 and spleen (Figure 4B), although we did observe an increase in the relative  
254 proportion of macrophages infiltrating the CNS of IgH[MOG] mice (Figure 4A).

255 We then assessed the frequency of immune cell proportions at disease  
256 endpoint (d14). Strikingly, the proportion of CD4<sup>+</sup> T cells was significantly  
257 increased in the CNS of IgH[MOG] mice relative to NOD (Figure 4C). CD8<sup>+</sup> T  
258 cells, dendritic cells and neutrophils were also more prevalent in the CNS of  
259 IgH[MOG] (Figure 4C), though overall frequency of these cells were low in all  
260 mice studied (<5%). The frequency of CD4<sup>+</sup> T cells was also higher in the

261 spleens of IgH[MOG] mice at endpoint, suggesting their expansion in these  
262 animals (Figure 4D). Interestingly, despite having an antigenic repertoire heavily  
263 skewed towards MOG reactivity, immunized IgH[MOG] mice did not display an  
264 increased frequency of B cells in either the CNS (Figure 4C) or spleen (Figure  
265 4D) at endpoint. These findings suggested that while IgH[MOG] B cells might be  
266 important in driving T cell expansion and infiltration into the CNS, they might  
267 themselves be of secondary importance to the development of severe EAE in  
268 IgH[MOG] mice.

269

270 *CNS-infiltrating IgH[MOG] CD4<sup>+</sup> T cells produce increased levels of IL-17 and*  
271 *GM-CSF.*

272 As we had observed an elevated frequency of CD4<sup>+</sup> T cells in the CNS of  
273 sick IgH[MOG] mice, we next examined the capacity of these cells to produce  
274 inflammatory Th1 and Th17 cytokines by flow cytometry, due to the well-  
275 established role of these CD4<sup>+</sup> effector T cell subsets in EAE [23]. We observed  
276 no differences between IgH[MOG] and WT CD4<sup>+</sup> T cells in their production of the  
277 Th1 signature cytokine IFN- $\gamma$  in the CNS (Figure 5A). By contrast we saw a  
278 striking upregulation of IL-17 production from CNS-infiltrating CD4<sup>+</sup> T cells from  
279 IgH[MOG] at disease endpoint (Figure 5B). Notably, production of GM-CSF, a  
280 key pathogenic cytokine implicated in Th17-driven tissue inflammation, was also  
281 augmented in IgH[MOG] CD4<sup>+</sup> T cells (Figure 5C), though no differences were  
282 noted in the production of TNF $\alpha$  (Figure 5D). In sum, our data showed that Th17

283 cells were preferentially recruited to the CNS of IgH[MOG] mice with severe  
284 EAE.

285

286 *IgH[MOG] B cells have an augmented capacity to prime inflammatory MOG<sub>[35-55]</sub>-*  
287 *specific CD4<sup>+</sup> T cells*

288 Thus far, we had found evidence of increased expansion and cytokine  
289 production from CD4<sup>+</sup> T cells in IgH[MOG] mice. As B cells can express MHC  
290 class II and are thus capable of presenting antigen to CD4<sup>+</sup> T cells [24], we  
291 wanted to assess whether IgH[MOG] B cells intrinsically possess an enhanced  
292 capacity to prime MOG<sub>[35-55]</sub>-specific T cell responses. We purified splenic B cells  
293 from unimmunized IgH[MOG] or WT NOD mice and, in the presence or absence  
294 of MOG<sub>[35-55]</sub>, co-cultured these cells with antigen-inexperienced CD4<sup>+</sup> T cells  
295 from transgenic 1C6 mice. 1C6 mice are on the NOD background and have class  
296 II-restricted T cell receptor specificity to MOG<sub>[35-55]</sub> [25]. IgH[MOG] and WT B  
297 cells did not differ in their capacity to induce CD4<sup>+</sup> T cell proliferation in response  
298 to MOG<sub>[35-55]</sub> (Figure 6A). However, IgH[MOG] B cells elicited a greater frequency  
299 of CD4<sup>+</sup> T cells that expressed IFN- $\gamma$ , IL-17, and the autocrine T cell growth  
300 factor IL-2 (Figure 6B). Altogether, our findings indicated that IgH[MOG] B cells  
301 may shape the initial Ag-specific activation of T cells by promoting their  
302 generation of inflammatory cytokines.

303

304

305

306 **Discussion**

307

308 The role of CD4<sup>+</sup> T cells in the autoimmune pathogenesis of MS is well-  
309 established. Notably, genome-wide association studies (GWAS) have revealed  
310 that polymorphisms in the human leukocyte antigen class II region, which  
311 restricts the CD4<sup>+</sup> T cell repertoire, are strongly associated with MS susceptibility  
312 [26]. Further, many of the current treatments of MS are believed to target T cell  
313 responses [27-29]. However, the success of the B cell-depleting drug  
314 ocrelizumab in both RRMS and PPMS has intensified recent interest in the  
315 contribution of B cells to disease processes [30].

316 IgH[MOG] mice were initially described on the C57BL/6 (B6) and SJL/J  
317 genetic backgrounds. On the B6 background, IgH[MOG] mice showed an  
318 increased incidence of EAE, relative to WT, when immunized with whole MOG  
319 protein [14]. Intriguingly, IgH[MOG] SJL/J mice developed EAE of greater  
320 severity than controls when immunized with the myelin-derived epitope  
321 proteolipid protein (PLP)<sub>[139-154]</sub> [14], which induces a relapsing/remitting disease  
322 pattern in SJL/J background mice [31]. This suggested that the presence of  
323 MOG-reactive B cells could contribute to EAE pathology that was driven by a  
324 class II-restricted peptide; however, the nature of a putative collaboration  
325 between B cells and T cells in disease processes remained incompletely defined.

326 In our study, we actively immunized IgH[MOG] mice on NOD background with  
327 the class II restricted peptide MOG<sub>[35-55]</sub>. This permitted us to study the  
328 contribution of MOG-reactive B cells in a model of EAE that is initiated by CD4<sup>+</sup> T

329 cells. While WT NOD mice developed a gradual, chronic MOG<sub>[35-55]</sub>-driven  
330 disease course, with severe symptoms appearing only many weeks after  
331 immunization, we found that 80% of IgH[MOG] NOD mice develop severe and  
332 frequently lethal disease within 14 days, that was characterized by inflammation  
333 and demyelination in brain, optic nerve and spinal cord. Cellular characterization  
334 of mononuclear infiltrate showed an increased frequency of CD4<sup>+</sup> T cells, but not  
335 B cells, in the CNS of IgH[MOG] relative to controls. It was previously shown that  
336 IgH[MOG] x 1C6 double-transgenic mice on the NOD background develop  
337 spontaneous EAE, while single-transgenic IgH[MOG] or 1C6 mice do not [25].  
338 These findings indicated that the collaboration of both myelin-specific B and T  
339 cells in the same animal could induce CNS autoimmunity; however, it was difficult  
340 to determine whether B or T cell-driven responses were initially responsible for  
341 disease induction in this model. Here, by using a myelin-derived, class II-  
342 restricted, immunogen, we show that B cells augment EAE even when CD4<sup>+</sup> T  
343 cells initiate disease.

344 Intriguingly, CNS-infiltrating IgH[MOG] CD4<sup>+</sup> T cells generated significant  
345 amounts of the type-17 cytokines IL-17 and GM-CSF. Several lines of evidence  
346 indicate that Th17 cells can shape B cell responses *in vivo*. Adoptive transfer of  
347 myelin-specific Th17 cells induced both B cell isotype class switching and  
348 germinal center formation in an IL-17-dependent manner [32]. Further, Th17 cells  
349 are crucial for the development of B cell-rich ectopic lymphoid structures [33,34],  
350 which are associated with rapid acceleration of the disease. Here, our data



351 suggest that the inverse may also be true and that B cells may reinforce and  
352 augment Th17-mediated pathogenicity in the CNS.

353 A key antibody independent function of B cells is the antigen presentation  
354 to T cells, and B cells are particularly efficient at presenting their cognate antigen  
355 [35]. Interestingly, we found that in the presence of MOG<sub>[35-55]</sub>, IgH[MOG] B cells  
356 were better able than WT B cells to induce the production of inflammatory  
357 cytokines from MOG<sub>[35-55]</sub>-reactive CD4<sup>+</sup> T cells. These findings are broadly in  
358 line with previous observations that splenocytes from 1C6 x IgH[MOG] mice  
359 showed enhanced responses to MOG<sub>[35-55]</sub> relative to splenocytes from 1C6  
360 single-transgenic animals [25], and they demonstrate that MOG-specific B cells  
361 have a greater intrinsic capacity to induce the differentiation of cognate antigen  
362 specific T cells. B cell antigen presentation plays a crucial role in autoimmune  
363 responses to whole MOG protein, as mice specifically lacking MHC class II  
364 expression on B cells (B-MHC-II<sup>-/-</sup>) are resistant to human MOG-induced EAE  
365 [24]. Notably, however, B-MHC-II<sup>-/-</sup> mice develop EAE in response to MOG<sub>[35-55]</sub>.  
366 Thus, in mice with an unbiased B cell repertoire, B cell-dependent antigen  
367 presentation to T cells may play an important role in the processing and  
368 presentation of secondary MOG-derived epitopes. However, when a large  
369 frequency of MOG-reactive B cells are initially present, as is the case in  
370 IgH[MOG] mice, antigen presentation of MOG<sub>[35-55]</sub> itself by B cells may  
371 exacerbate disease severity.

372

373

374 **Conclusion**

375 In this study, we provide evidence that in the presence of a B cell repertoire that  
376 is skewed towards MOG, NOD background mice develop unusually severe EAE  
377 upon immunization with the classic class II-restricted peptide MOG<sub>[35-55]</sub>. Disease  
378 is characterized by an influx of highly inflammatory CD4<sup>+</sup> T cells into the CNS.  
379 Our findings support a role for myelin-reactive B cells in augmenting T cell-driven  
380 CNS autoimmunity.

381

382 **Abbreviations**

383

384 Ab, antibody; CNS, central nervous system; CSF, cerebrospinal fluid; CTV,  
385 CellTrace Violet; EAE, experimental autoimmune encephalomyelitis; EP,  
386 endpoint; GM-CSF, granulocyte and macrophage colony stimulating factor; H&E,  
387 hematoxylin & eosin; IFN, interferon; Ig, immunoglobulin; IL, interleukin; LFB,  
388 Luxol fast blue; MHC, major histocompatibility complex; MOG, myelin  
389 oligodendrocyte glycoprotein; MS, multiple sclerosis; NOD, non-obese diabetic;  
390 PLP, proteolipid protein; preonset, PO; RR, relapsing/remitting; SP, secondary  
391 progressive; TNF, tumor necrosis factor; UI, unimmunized; WT, wildtype

392

393

394

395

396

397 **Declarations**

398

399 *Ethics approval*

400 All mouse breedings and experiments are approved by the Animal Protection  
401 Committee of the Centre de recherche du CHU de Quebec - Université Laval  
402 (protocols 13-070-2 and 17-090-2).

403

404 *Consent for publication*

405 Not applicable

406

407 *Availability of data and materials*

408 Data sharing is not applicable to this article as no datasets were generated or  
409 analysed during the current study.

410

411 *Competing interests*

412 The authors declare no competing interests.

413

414 *Funding*

415 The work was supported by a Biomedical Operating Grant from the MS Society  
416 of Canada (#3036) to MR. PMIAD is supported by a doctoral studentship from  
417 the Multiple Sclerosis Society of Canada and PG holds a Ph.D. fellowship from  
418 the Fonds recherche du Québec – Santé (FRQS). NB is Junior-1 scholar, and  
419 MR is a Junior-2 scholar, of the FRQS.

420

421 *Authors' contributions*

422 PMIAD directed the project, conducted experiments and wrote the manuscript.

423 APY and JB conducted experiments. BM and SL conducted histological

424 analyses. PG and NB assisted with serum detection of immunoglobulins. MR

425 supervised the project and wrote the manuscript. All authors read and approved

426 the final manuscript.

427

428 *Acknowledgements*

429 We thank Hartmut Wekerle and Vijay Kuchroo for providing us with IgH[MOG]

430 and 1C6 mice respectively. We thank Alexandre Brunet and Stéphanie Fiola for

431 technical assistance with flow cytometry and Andre Machado Xavier for ImageJ

432 analysis.

433

434 **Figure legends**

435

436 **Figure 1. Active immunization with MOG<sub>[35-55]</sub> induces severe EAE in**

437 **IgH[MOG] mice.** Female IgH[MOG] (n=10) and WT NOD (n=8) were immunized

438 with MOG<sub>[35-55]</sub> and were monitored for the development of EAE. IgH[MOG],n=10;

439 NOD, n=8. \*\* p<0.01, Mann-Whitney *U* test. Representative of 3 experiments and

440 a total of 27 IgH[MOG] and 19 NOD.

441

442 **Figure 2. Immune cells infiltrated into the CNS of IgH[MOG] mice and**  
443 **caused demyelination.** CNS tissues from an immunized female IgH[MOG]  
444 recipient were isolated once it reached experimental endpoints, and H&E (**A-D**)  
445 and hematoxylin and Luxol fast blue (**E-H**) stainings were conducted. Cerebellum  
446 (**A, E**) and pons (**B, F**), 10 X magnification; spinal cord (**C, G**) and optic nerve (**D,**  
447 **H**), 20X magnification. Scale bar: 100 $\mu$ m. Representative of 5 mice.

448

449 **Figure 3. Decrease in plasma IgM in immunized IgH[MOG] mice.** Plasma  
450 were collected from the blood of female NOD or IgH[MOG] mice that were  
451 unimmunized (UI) NOD or from MOG<sub>[35-55]</sub>-immunized NOD or IgH[MOG] mice at  
452 pre-onset (PO) or disease endpoint (EP). Plasma IgM levels were measured. \*  
453  $p < 0.05$ , *t*-test. IgH[MOG],  $n = 4$ ; NOD,  $n = 5$ .

454

455 **Figure 4. Increased infiltration of peripheral immune cells in the CNS of**  
456 **immunized IgH[MOG] mice. A, B.** IgH[MOG] ( $n = 5$ ) and WT NOD ( $n = 5$ ) female  
457 mice were immunized with MOG<sub>[35-55]</sub>, sacrificed at d5, and CNS (**A**) and Splenic  
458 (**B**) immune populations (CD4<sup>+</sup> T cells, CD8<sup>+</sup> T cells, CD11c<sup>+</sup>CD11b<sup>+</sup> dendritic  
459 cells, CD11c<sup>-</sup>Ly6G<sup>-</sup>CD11b<sup>+</sup> macrophages and Ly6G<sup>+</sup>CD11b<sup>+</sup> neutrophils) were  
460 enumerated. **C, D.** IgH[MOG] ( $n = 13$ ) and WT NOD ( $n = 8$ ) female mice were  
461 immunized with MOG<sub>[35-55]</sub> and sacrificed at d14. CNS-infiltrating (**C**) and splenic  
462 (**D**) immune cells were enumerated. \*  $p < 0.05$ , \*\*  $p < 0.001$ , \*\*\*  $p < 0.0005$ , \*\*\*\*  
463  $p < 0.0001$ , *t*-test n.s., not significant.

464

465 **Figure 5. CNS-infiltrating IgH[MOG] CD4<sup>+</sup> T cells produce increased levels**  
466 **of IL-17 and GM-CSF.** IgH[MOG] (n=5) and WT NOD (n=5) female mice were  
467 immunized with MOG<sub>[35-55]</sub> and sacrificed at disease endpoints. Production of  
468 IFN $\gamma$  (A), IL-17 (B), GM-CSF (C) and TNF $\alpha$  (D) was assessed by intracellular  
469 flow cytometry from CNS-infiltrating CD4<sup>+</sup> T cells. \* p<0.05, \*\* p<0.005, t-test.

470

471 **Figure 6. B cells from IgH[MOG] are better antigen presenting cells to CD4<sup>+</sup>**  
472 **T cells.** B cells from male IgH[MOG] or NOD mice were co-cultured with  
473 CellTrace Violet-labeled CD4<sup>+</sup> T cells from male 1C6 mice, and with 0,1 or  
474 10 $\mu$ g/ml MOG<sub>[35-55]</sub>. Cell proliferation (A) and the production of IFN $\gamma$ , IL-17 and  
475 IL-2 (B) by CD4<sup>+</sup> T cells were assessed using flow cytometry. Gating percentage  
476 in (A) corresponds to the percentage of cells that underwent at least one division.  
477 B, \* p<0.05, \*\* p<0.01, \*\*\* p<0.001, two way ANOVA measuring the effect of  
478 mouse strain (NOD vs. IgH[MOG]) as a variable. Triplicate cultures,  
479 representative of three experiments.

480

## 481 **References**

- 482 1. Kingwell E, Marriott JJ, Jetté N, Pringsheim T, Makhani N, Morrow SA, et al.  
483 Incidence and prevalence of multiple sclerosis in Europe: a systematic review.  
484 BMC neurology [Internet]. BioMed Central; 2013;13:128. Available from:  
485 <http://bmcneurol.biomedcentral.com/articles/10.1186/1471-2377-13-128>
- 486 2. Larochelle C, Uphaus T, Prat A, Zipp F. Secondary Progression in Multiple  
487 Sclerosis: Neuronal Exhaustion or Distinct Pathology? Trends in Neurosciences.  
488 2016;39:325–39.
- 489 3. Thompson A. Overview of primary progressive multiple sclerosis (PPMS):  
490 similarities and differences from other forms of MS, diagnostic criteria, pros and  
491 cons of progressive diagnosis. Mult. Scler. [Internet]. 2004;10 Suppl 1:S2–7.  
492 Available from:

- 493 <http://eutils.ncbi.nlm.nih.gov/entrez/eutils/elink.fcgi?dbfrom=pubmed&id=1521880>  
494 [3&retmode=ref&cmd=prlinks](http://eutils.ncbi.nlm.nih.gov/entrez/eutils/elink.fcgi?dbfrom=pubmed&id=1521880)
- 495 4. Baranzini SE, Jeong MC, Butunoi C, Murray RS, Bernard CC, Oksenberg JR.  
496 B cell repertoire diversity and clonal expansion in multiple sclerosis brain lesions.  
497 *J. Immunol.* [Internet]. 1999;163:5133–44. Available from:  
498 <http://eutils.ncbi.nlm.nih.gov/entrez/eutils/elink.fcgi?dbfrom=pubmed&id=1052822>  
499 [0&retmode=ref&cmd=prlinks](http://eutils.ncbi.nlm.nih.gov/entrez/eutils/elink.fcgi?dbfrom=pubmed&id=1052822)
- 500 5. Owens GP, Kraus H, Burgoon MP, Smith-Jensen T, Devlin ME, Gilden DH.  
501 Restricted use of VH4 germline segments in an acute multiple sclerosis brain.  
502 *Ann. Neurol.* [Internet]. 1998;43:236–43. Available from:  
503 <http://doi.wiley.com/10.1002/ana.410430214>
- 504 6. Owens GP, Ritchie AM, Burgoon MP, Williamson RA, Corboy JR, Gilden DH.  
505 Single-cell repertoire analysis demonstrates that clonal expansion is a prominent  
506 feature of the B cell response in multiple sclerosis cerebrospinal fluid. *J.*  
507 *Immunol.* [Internet]. 2003;171:2725–33. Available from:  
508 <http://eutils.ncbi.nlm.nih.gov/entrez/eutils/elink.fcgi?dbfrom=pubmed&id=1292842>  
509 [6&retmode=ref&cmd=prlinks](http://eutils.ncbi.nlm.nih.gov/entrez/eutils/elink.fcgi?dbfrom=pubmed&id=1292842)
- 510 7. Magliozzi R, Howell O, Vora A, Serafini B, Nicholas R, Puopolo M, et al.  
511 Meningeal B-cell follicles in secondary progressive multiple sclerosis associate  
512 with early onset of disease and severe cortical pathology. *Brain.* 2007;130:1089–  
513 104.
- 514 8. Uccelli A, Aloisi F, Pistoia V. Unveiling the enigma of the CNS as a B-cell  
515 fostering environment. *Trends Immunol.* [Internet]. 2005;26:254–9. Available  
516 from: <https://linkinghub.elsevier.com/retrieve/pii/S1471490605000487>
- 517 9. Genain CP, Cannella B, Hauser SL, Raine CS. Identification of autoantibodies  
518 associated with myelin damage in multiple sclerosis. *Nature Publishing Group;*  
519 1999;5:170–5. Available from: [http://www.nature.com/articles/nm0299\\_170](http://www.nature.com/articles/nm0299_170)
- 520 10. Kappos L, Li D, Calabresi PA, O'Connor P, Bar-Or A, Barkhof F, et al.  
521 Ocrelizumab in relapsing-remitting multiple sclerosis: a phase 2, randomised,  
522 placebo-controlled, multicentre trial. *Lancet* [Internet]. 2011;378:1779–87.  
523 Available from: <https://linkinghub.elsevier.com/retrieve/pii/S0140673611616498>
- 524 11. Montalban X, Hauser SL, Kappos L, Arnold DL, Bar-Or A, Comi G, et al.  
525 Ocrelizumab versus Placebo in Primary Progressive Multiple Sclerosis. *N. Engl.*  
526 *J. Med.* 2016.
- 527 12. Lehmann-Horn K, Kronsbein HC, Weber MS. Targeting B cells in the  
528 treatment of multiple sclerosis: recent advances and remaining challenges.  
529 *SAGE Publications;* 2013;6:161–73. Available from:  
530 <http://tan.sagepub.com/cgi/doi/10.1177/1756285612474333>

- 531 13. Rangachari M, Kuchroo VK. Using EAE to better understand principles of  
532 immune function and autoimmune pathology. *J. Autoimmun.* 2013.
- 533 14. Litzemberger T, Fässler R, Bauer J, Lassmann H, Linington C, Wekerle H, et  
534 al. B lymphocytes producing demyelinating autoantibodies: development and  
535 function in gene-targeted transgenic mice. *J. Exp. Med.* 1998;188:169–80.
- 536 15. Dang AK, Jain RW, Craig HC, Kerfoot SM. B cell recognition of myelin  
537 oligodendrocyte glycoprotein autoantigen depends on immunization with protein  
538 rather than short peptide, while B cell invasion of the CNS in autoimmunity does  
539 not. *J. Neuroimmunol.* 2015;278:73–84.
- 540 16. Encinas JA, Wicker LS, Peterson LB, Mukasa A, Teuscher C, Sobel R, et al.  
541 QTL influencing autoimmune diabetes and encephalomyelitis map to a 0.15-cM  
542 region containing *Il2*. *Nat. Genet.* 1999;21:158–60.
- 543 17. Boivin N, Baillargeon J, Doss PMIA, Roy A-P, Rangachari M. Interferon- $\beta$   
544 suppresses murine Th1 cell function in the absence of antigen-presenting cells.  
545 *PLoS ONE.* 2015;10:e0124802.
- 546 18. Mayo L, Cunha APD, Madi A, Beynon V, Yang Z, Alvarez JI, et al. IL-10-  
547 dependent Tr1 cells attenuate astrocyte activation and ameliorate chronic central  
548 nervous system inflammation. *Brain.* 2016;139:1939–57.
- 549 19. Farez MF, Quintana FJ, Gandhi R, Izquierdo G, Lucas M, Weiner HL. Toll-  
550 like receptor 2 and poly(ADP-ribose) polymerase 1 promote central nervous  
551 system neuroinflammation in progressive EAE. *Nature Publishing Group*;  
552 2009;10:958–64. Available from:  
553 <http://www.nature.com/doi/10.1038/ni.1775>
- 554 20. Obermeier B, Mentele R, Malotka J, Kellermann J, Kümpfel T, Wekerle H, et  
555 al. Matching of oligoclonal immunoglobulin transcriptomes and proteomes of  
556 cerebrospinal fluid in multiple sclerosis. *Nature Publishing Group*; 2008;14:688–  
557 93. Available from: <http://www.nature.com/articles/nm1714>
- 558 21. Racine R, Winslow GM. IgM in microbial infections: taken for granted?  
559 *Immunol. Lett.* [Internet]. 2009;125:79–85. Available from:  
560 <https://linkinghub.elsevier.com/retrieve/pii/S016524780900162X>
- 561 22. Stevens TL, Bossie A, Sanders VM, Fernandez-Botran R, Coffman RL,  
562 Mosmann TR, et al. Regulation of antibody isotype secretion by subsets of  
563 antigen-specific helper T cells. *Nature* [Internet]. *Nature Publishing Group*;  
564 1988;334:255–8. Available from: <http://www.nature.com/articles/334255a0>
- 565 23. Domingues HS, Mues M, Lassmann H, Wekerle H, Krishnamoorthy G.  
566 Functional and pathogenic differences of Th1 and Th17 cells in experimental  
567 autoimmune encephalomyelitis. *PLoS ONE.* 2010;5:e15531.



- 568 24. Molnarfi N, Schulze-Topphoff U, Weber MS, Patarroyo JC, Prod'homme T,  
569 Varrin-Doyer M, et al. MHC class II-dependent B cell APC function is required for  
570 induction of CNS autoimmunity independent of myelin-specific antibodies. *J. Exp.*  
571 *Med.* 2013;210:2921–37.
- 572 25. Anderson AC, Chandwaskar R, Lee DH, Sullivan JM, Solomon A, Rodriguez-  
573 Manzanet R, et al. A transgenic model of central nervous system autoimmunity  
574 mediated by CD4+ and CD8+ T and B cells. *J. Immunol.* 2012;188:2084–92.
- 575 26. Field J, Browning SR, Johnson LJ, Danoy P, Varney MD, Tait BD, et al. A  
576 polymorphism in the HLA-DPB1 gene is associated with susceptibility to multiple  
577 sclerosis. Andreu AL, editor. *PLoS ONE* [Internet]. Public Library of Science;  
578 2010;5:e13454. Available from: <http://dx.plos.org/10.1371/journal.pone.0013454>
- 579 27. Noronha A, Toscas A, Jensen MA. Interferon beta decreases T cell activation  
580 and interferon gamma production in multiple sclerosis. *J. Neuroimmunol.*  
581 1993;46:145–53.
- 582 28. Duda PW, Schmied MC, Cook SL, Krieger JI, Hafler DA. Glatiramer acetate  
583 (Copaxone) induces degenerate, Th2-polarized immune responses in patients  
584 with multiple sclerosis. *J. Clin. Invest.* [Internet]. American Society for Clinical  
585 Investigation; 2000;105:967–76. Available from:  
586 <http://www.jci.org/articles/view/8970>
- 587 29. Stüve O, Marra CM, Bar-Or A, Niino M, Cravens PD, Cepok S, et al. Altered  
588 CD4+/CD8+ T-cell ratios in cerebrospinal fluid of natalizumab-treated patients  
589 with multiple sclerosis. *Arch. Neurol.* [Internet]. American Medical Association;  
590 2006;63:1383–7. Available from:  
591 <http://archneur.jamanetwork.com/article.aspx?doi=10.1001/archneur.63.10.1383>
- 592 30. Myhr K-M, Torkildsen Ø, Lossius A, Bø L, Holmøy T. B cell depletion in the  
593 treatment of multiple sclerosis. *Expert Opin Biol Ther.* 2019;19:261–71.
- 594 31. Vanderlugt CL, Miller SD. Epitope spreading in immune-mediated diseases:  
595 implications for immunotherapy. *Nature Publishing Group*; 2002;2:85–95.  
596 Available from: <http://www.nature.com/doi/10.1038/nri724>
- 597 32. Mitsdoerffer M, Lee Y, Jäger A, Kim H-J, Korn T, Kolls JK, et al.  
598 Proinflammatory T helper type 17 cells are effective B-cell helpers. *Proc. Natl.*  
599 *Acad. Sci. U.S.A.* [Internet]. National Academy of Sciences; 2010;107:14292–7.  
600 Available from: <http://www.pnas.org/cgi/doi/10.1073/pnas.1009234107>
- 601 33. Peters A, Pitcher LA, Sullivan JM, Mitsdoerffer M, Acton SE, Franz B, et al.  
602 Th17 cells induce ectopic lymphoid follicles in central nervous system tissue  
603 inflammation. *Immunity.* 2011;35:986–96.
- 604 34. Pikor NB, Astarita JL, Summers-Deluca L, Galicia G, Qu J, Ward LA, et al.  
605 Integration of Th17- and Lymphotoxin-Derived Signals Initiates Meningeal-

606 Resident Stromal Cell Remodeling to Propagate Neuroinflammation. *Immunity*.  
607 2015;43:1160–73.

608 35. Batista FD, Harwood NE. The who, how and where of antigen presentation to  
609 B cells. *Nat. Rev. Immunol.* 2009;9:15–27.

610

# Figure 1

bioRxiv preprint doi: <https://doi.org/10.1101/721696>; this version posted August 1, 2019. The copyright holder for this preprint (which was not certified by peer review) is the author/funder. All rights reserved. No reuse allowed without permission.

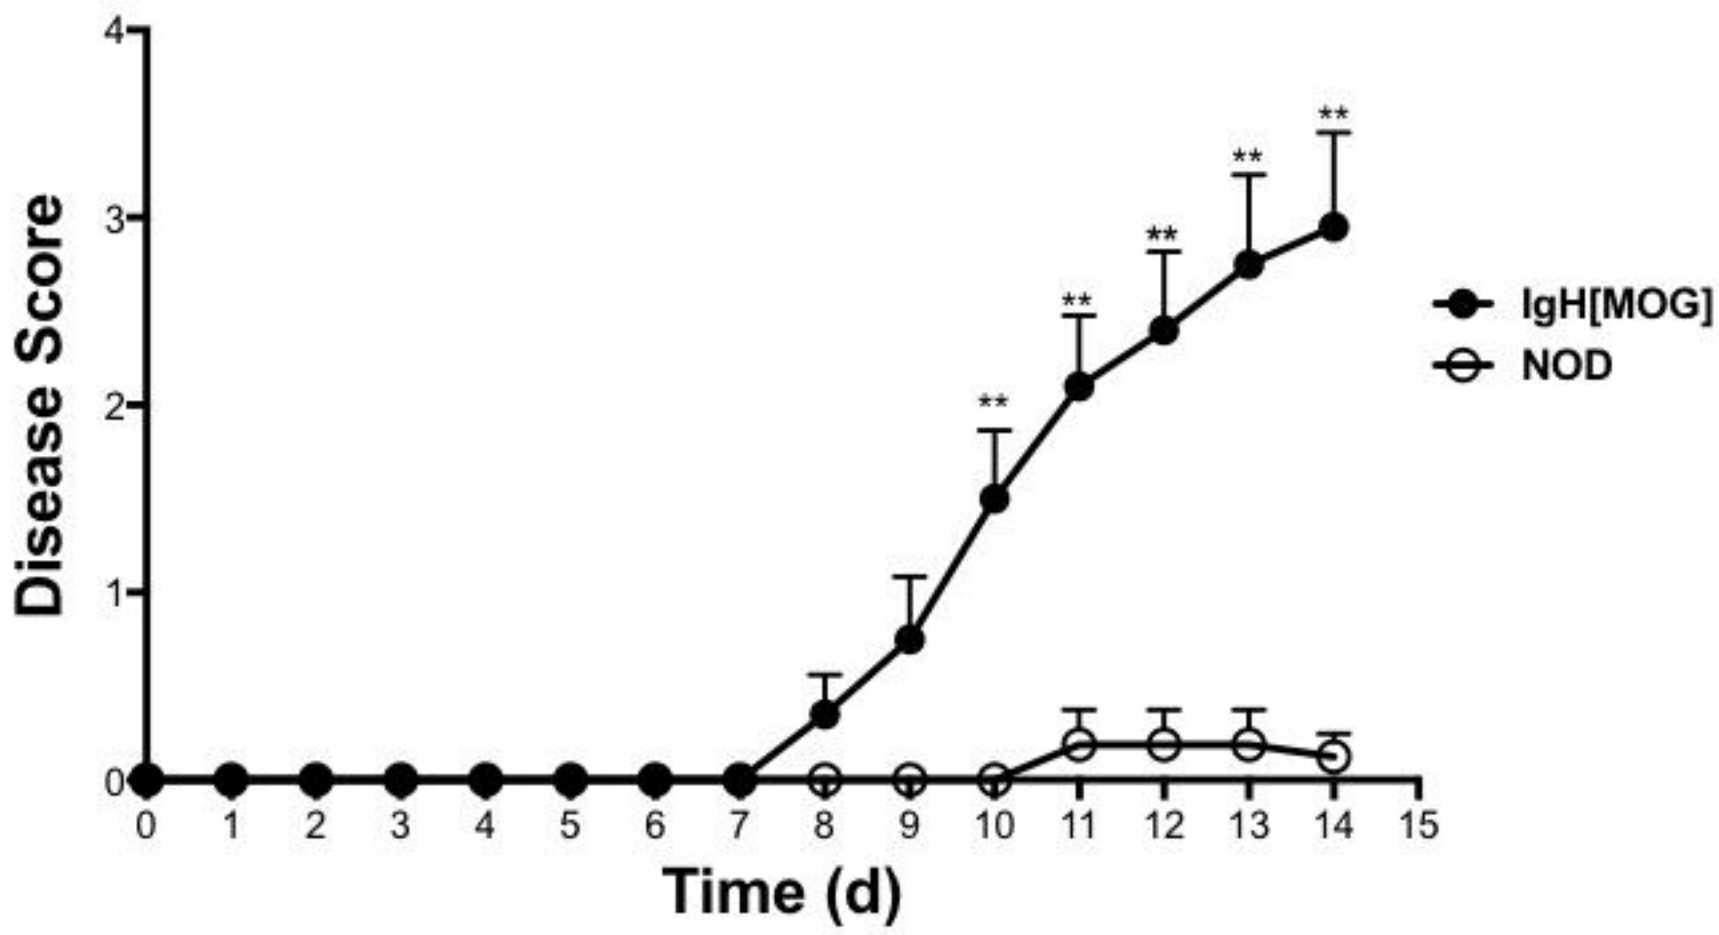

Figure 2

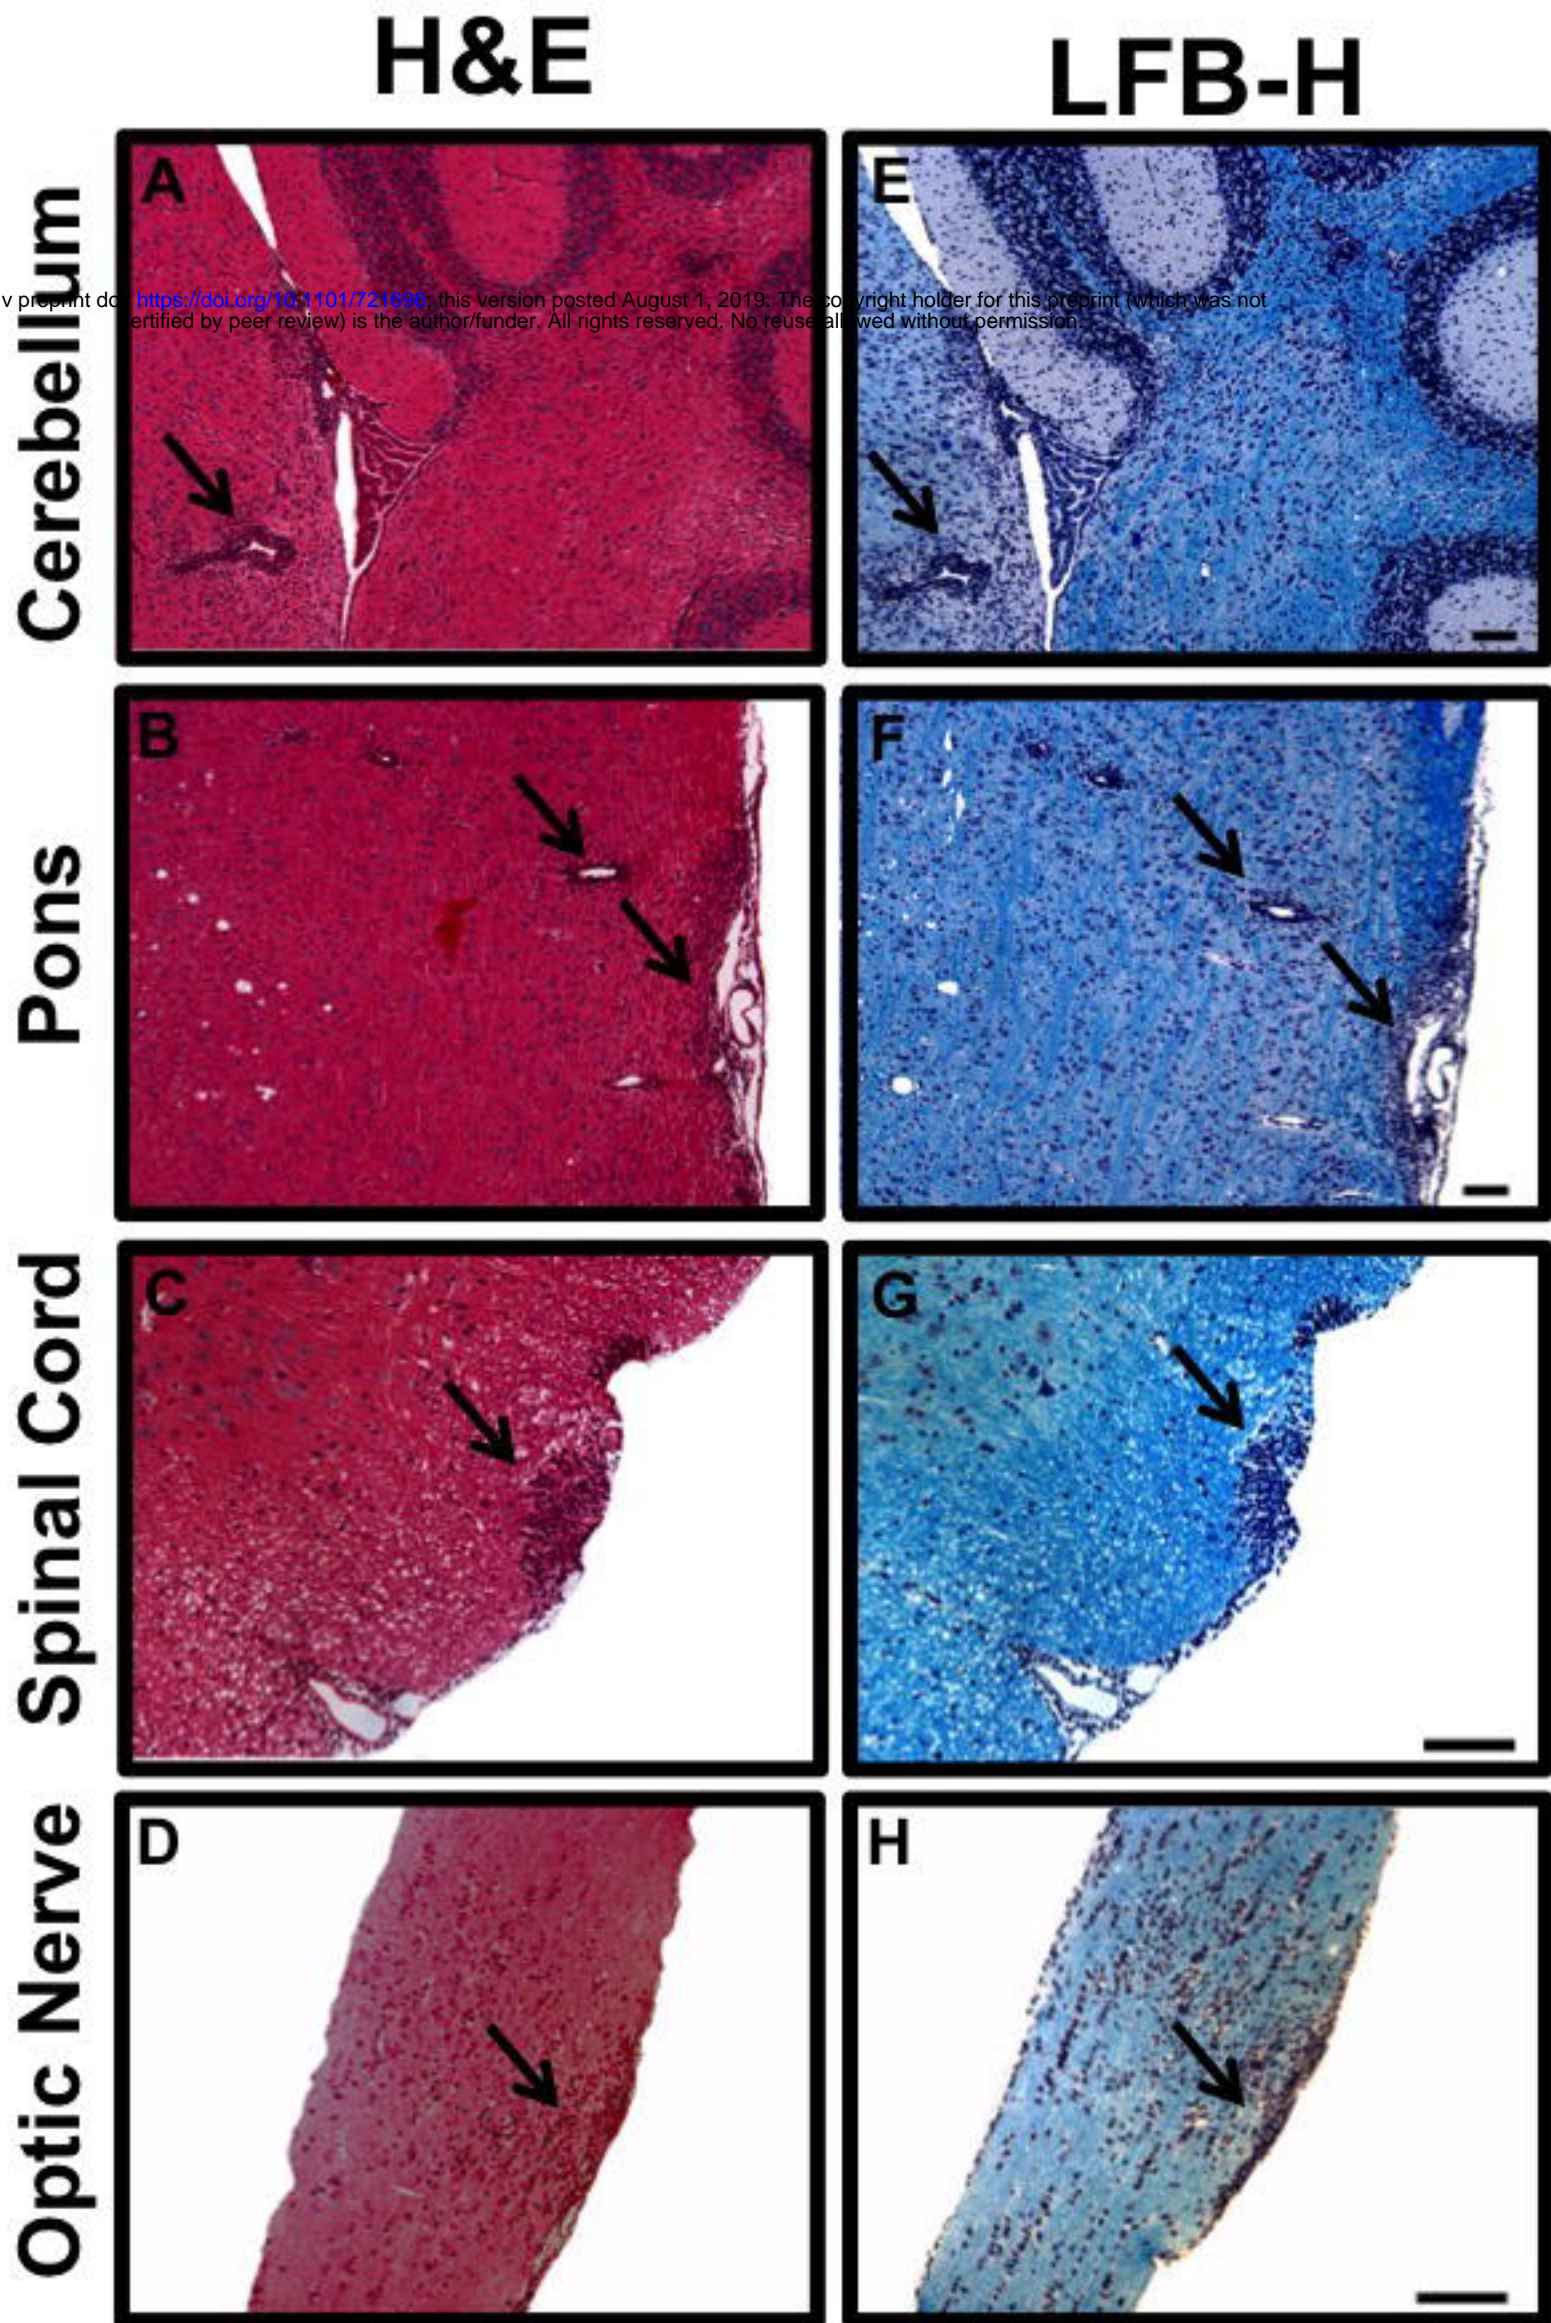

bioRxiv preprint doi: <https://doi.org/10.1101/721698>; this version posted August 1, 2019. The copyright holder for this preprint (which was not certified by peer review) is the author/funder. All rights reserved. No reuse allowed without permission.

# Figure 3

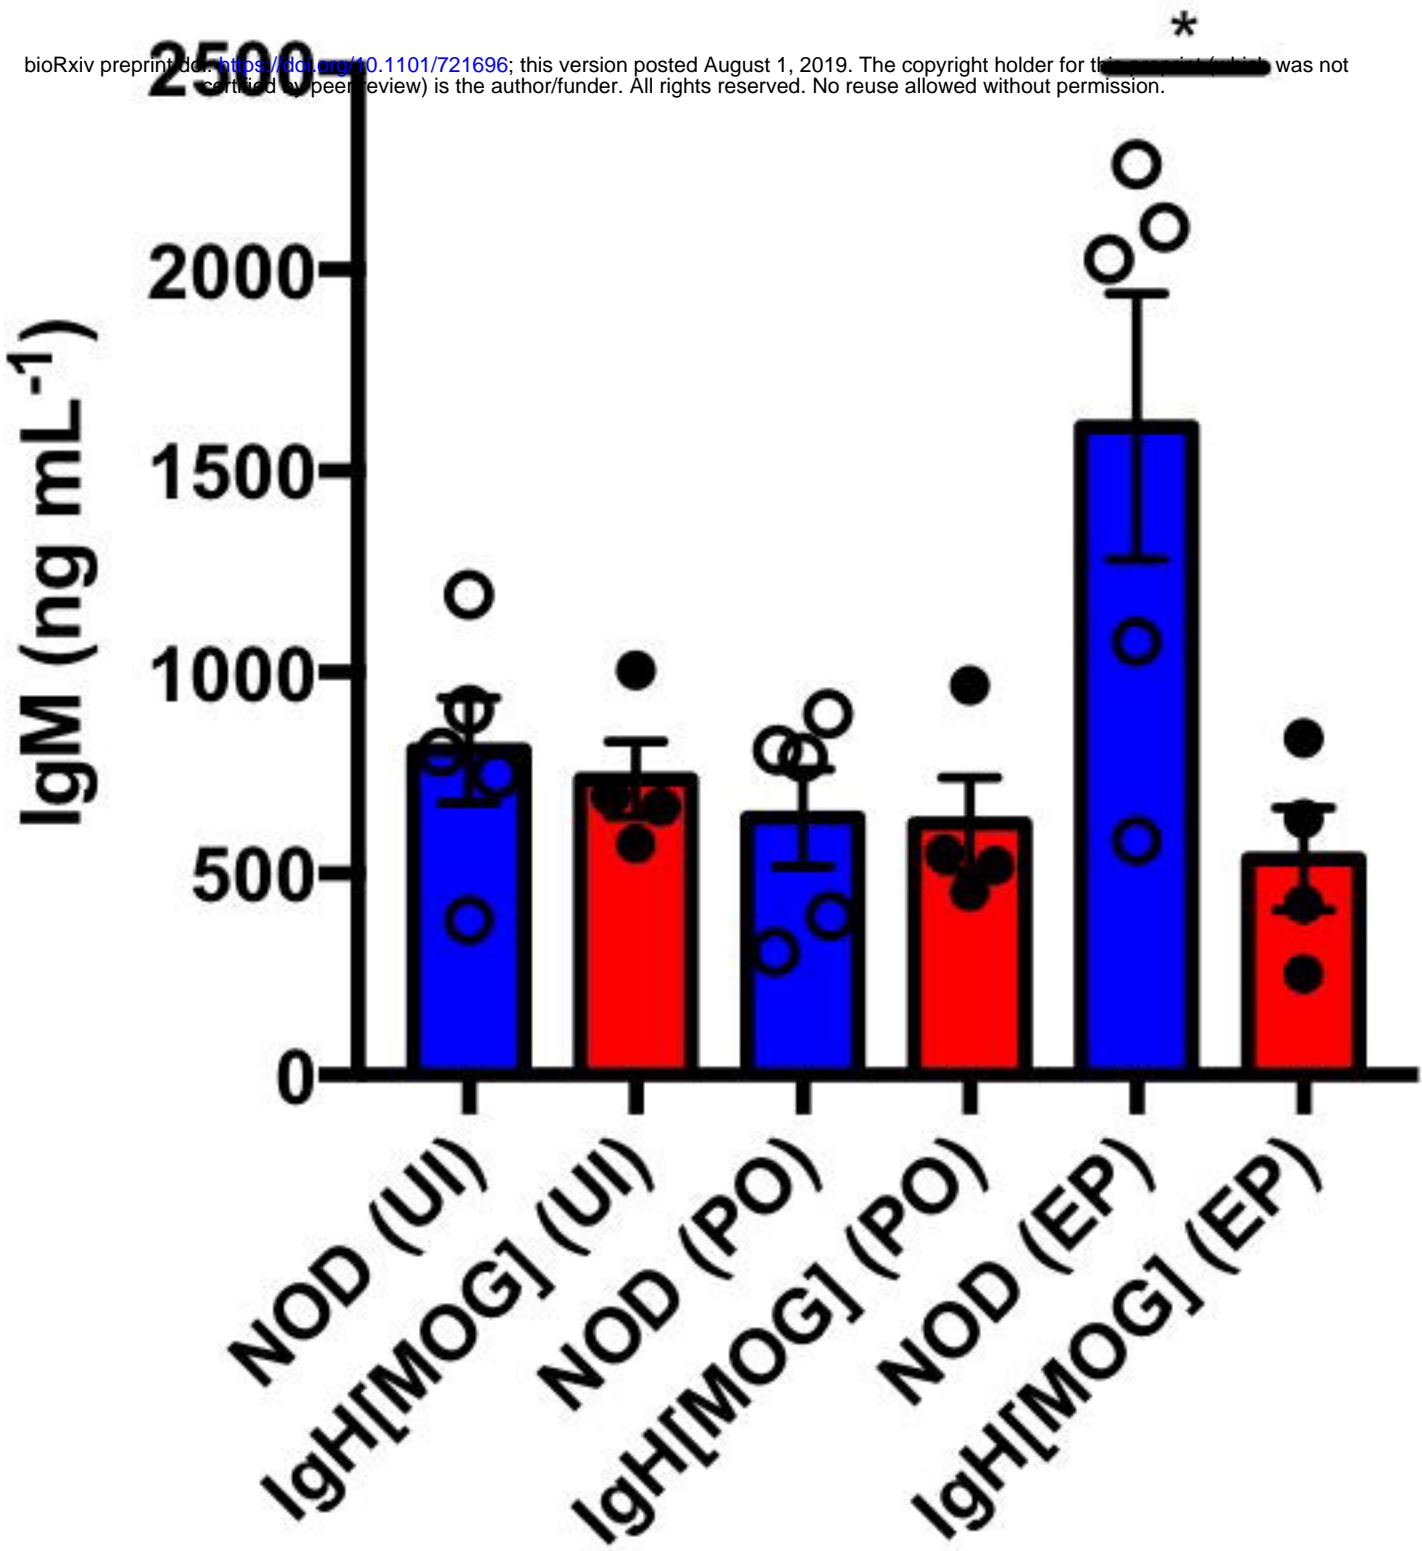

# Figure 4

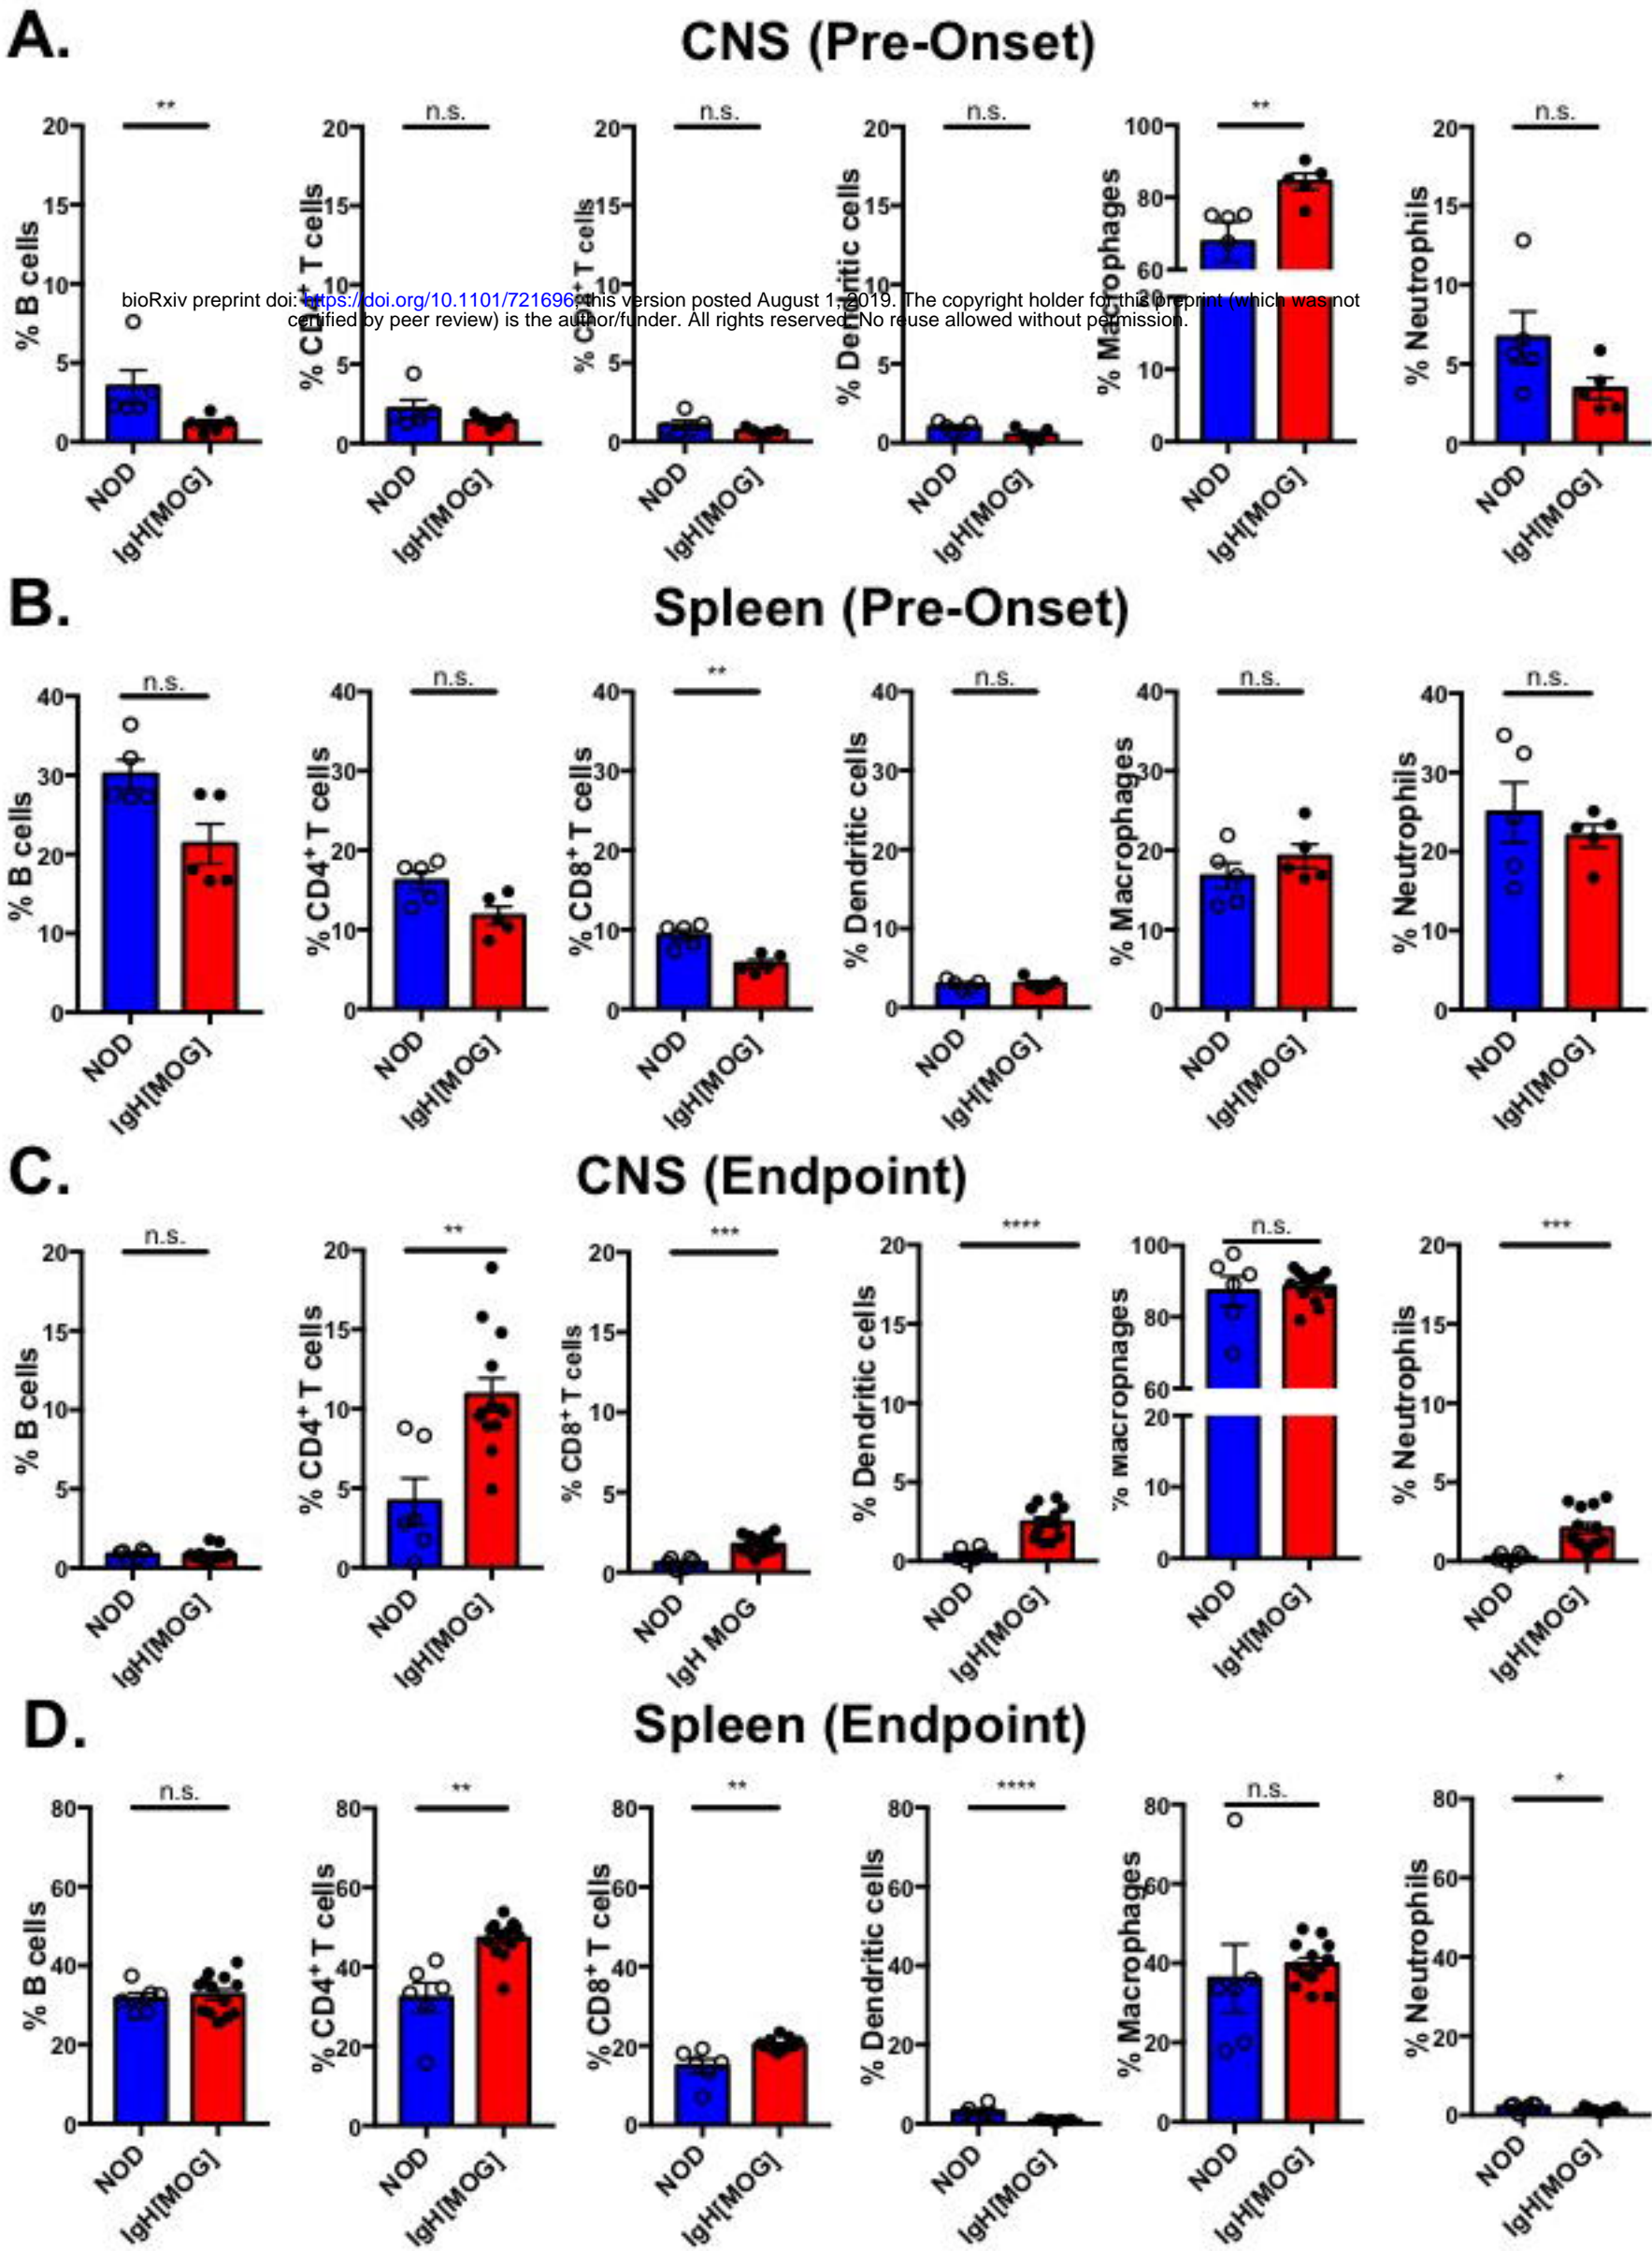

# Figure 5

CNS

NOD

IgH[MOG]

A.

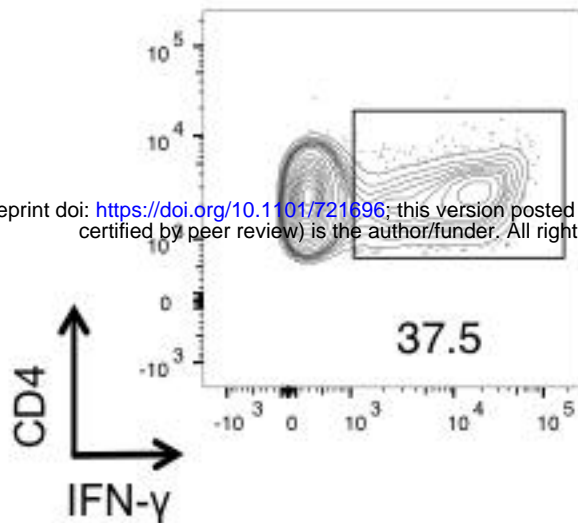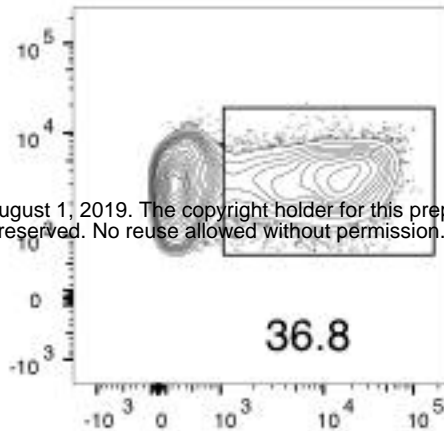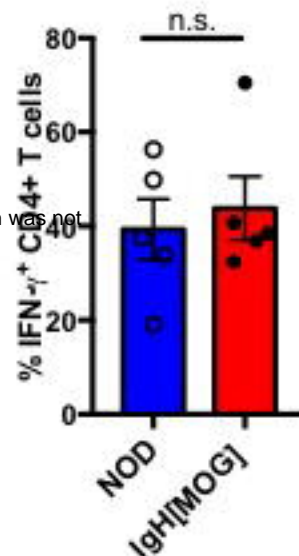

B.

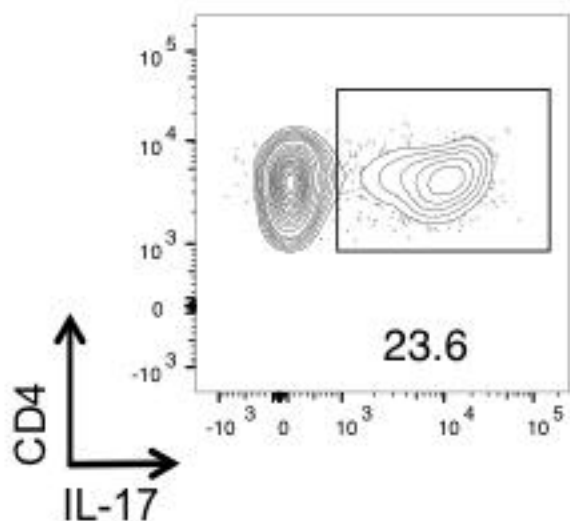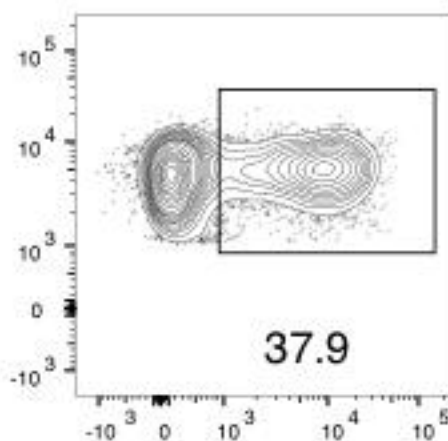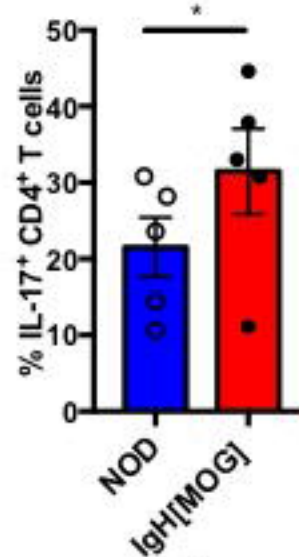

C.

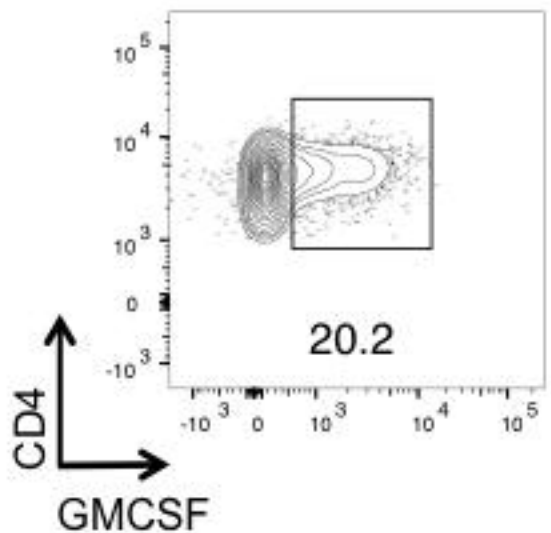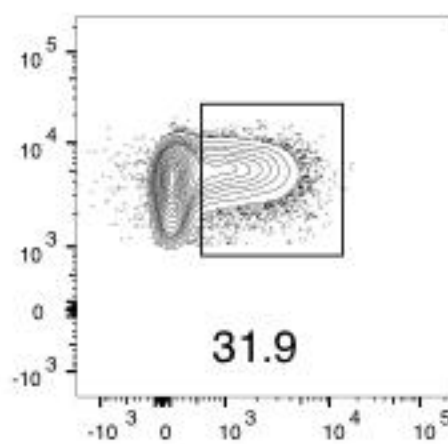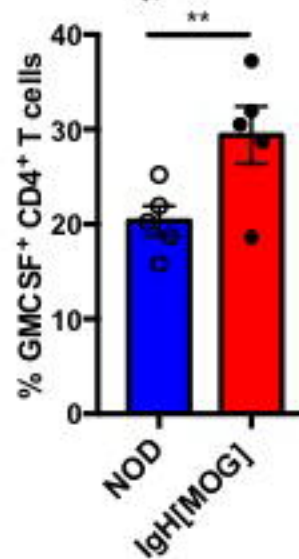

D.

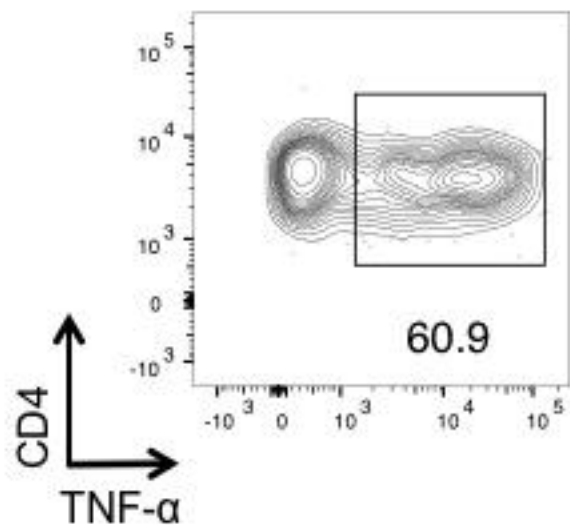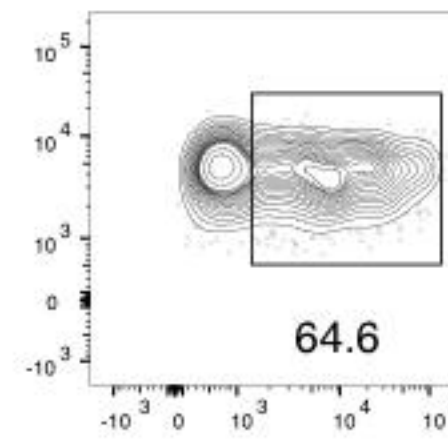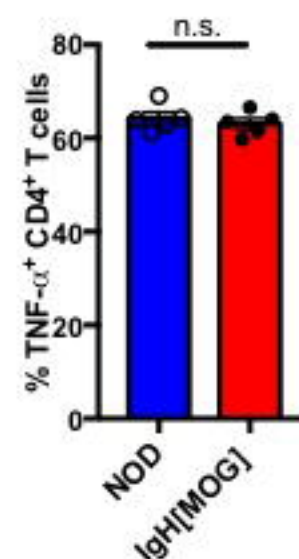

bioRxiv preprint doi: <https://doi.org/10.1101/721696>; this version posted August 1, 2019. The copyright holder for this preprint (which was not certified by peer review) is the author/funder. All rights reserved. No reuse allowed without permission.

# Figure 6

**A.**

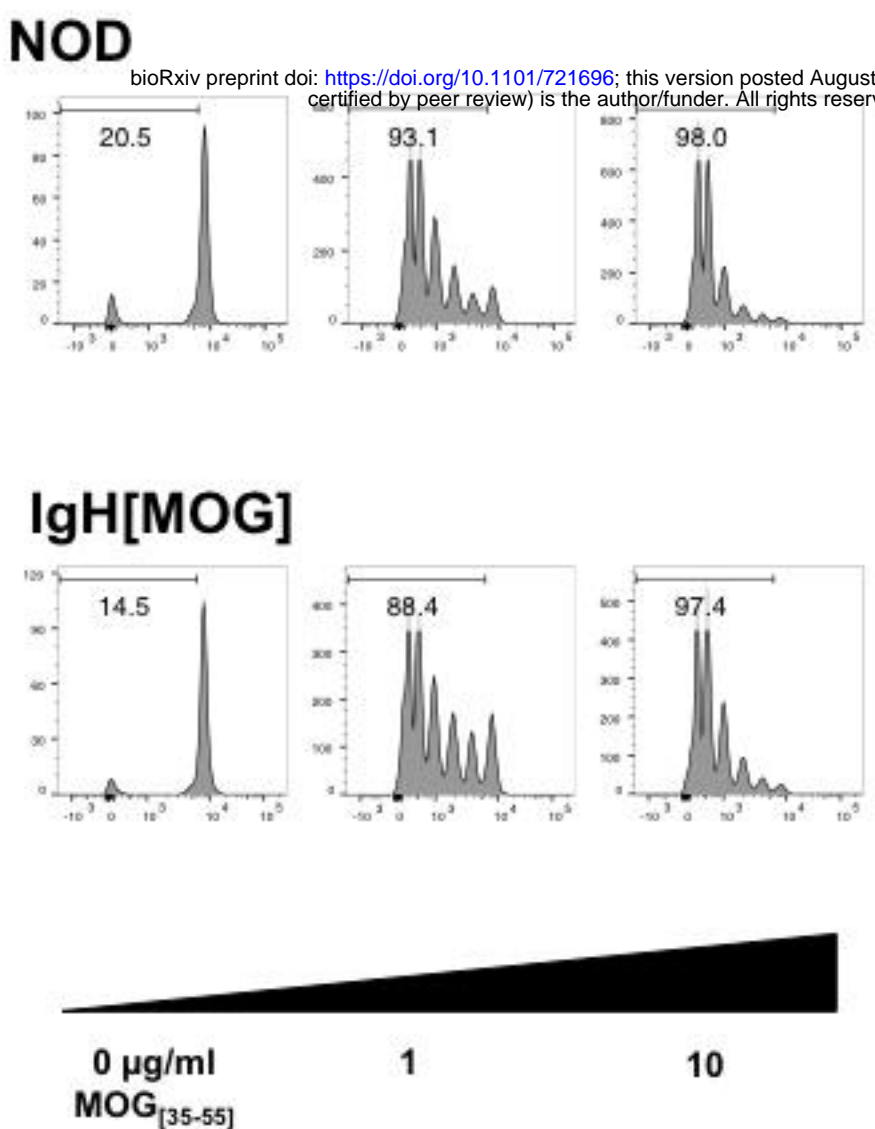

**B.**

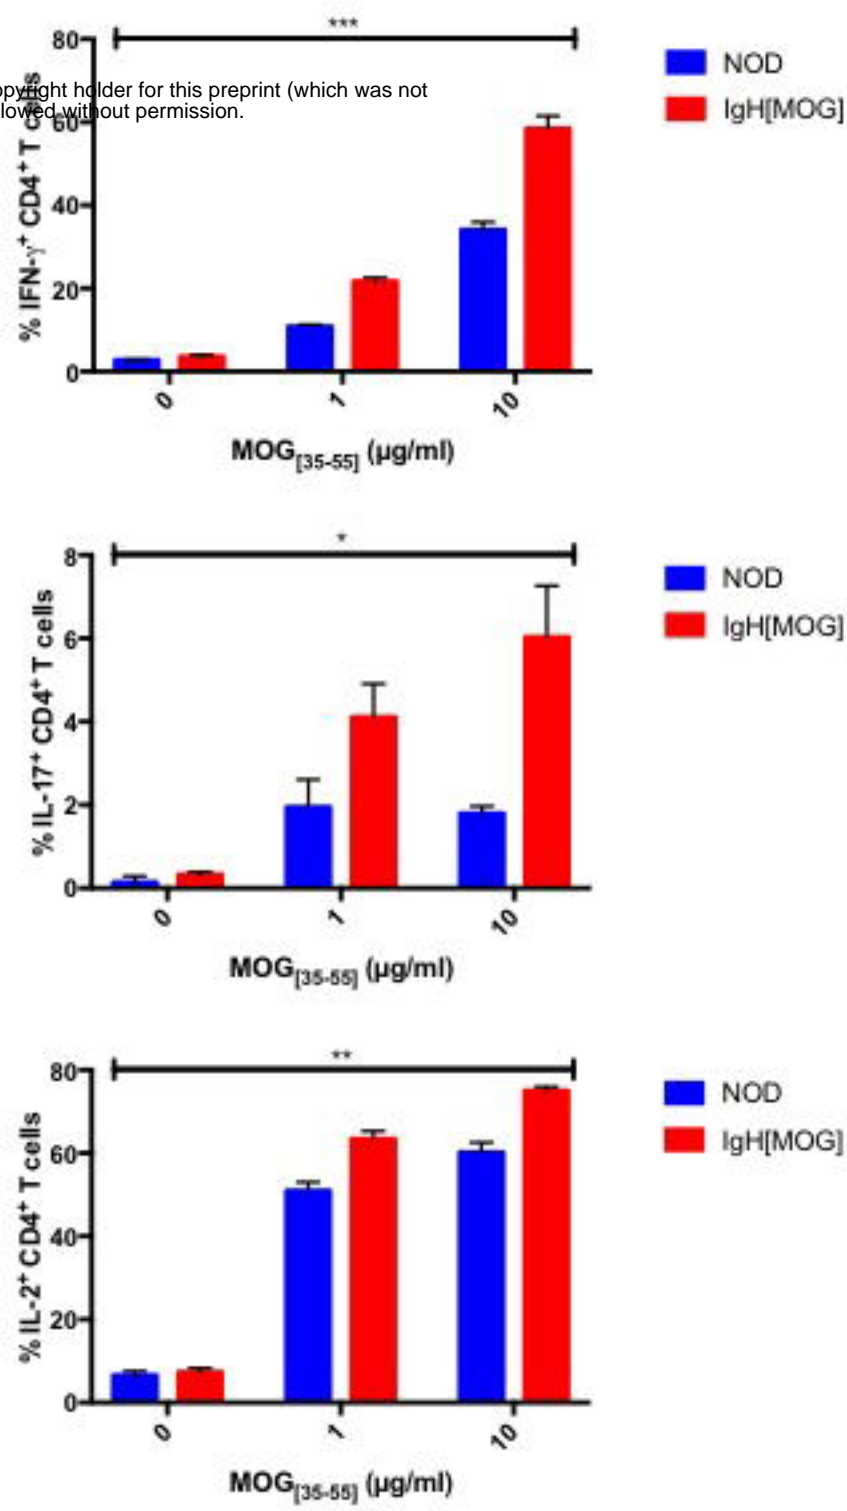

Source: https://www.biorxiv.org/content/10.1101/721696v1.full.pdf
